# Supplementary material for: Ferromagnetically coupled tetranuclear Ni( ii )-2-oxy-aceto- or benzo-phenonate complexes
Source: Royal Society of Chemistry journal article supplement (doi:10.1039/d4ra08700c), 2025-01-01
Supplement: d4ra08700c1.pdf [file d4ra08700c1.pdf]

## **Supplementary Information (SI)**

### **Ferromagnetically coupled tetranuclear Ni(II)-2-oxy-aceto or benzo-phenonates complexes**

Imdadul Haque<sup>1</sup>, Mohammed Enamullah<sup>1,\*</sup>, Nisat Taslum Jhumur<sup>1</sup>, Baldeep K. Sidhu<sup>2</sup>, David E Herbert<sup>2</sup>, Takin Haj Hassani Sohi<sup>3</sup>, Lubomír Havlíček<sup>4</sup>, Ivan Nemeč<sup>5</sup> and Christoph Janiak<sup>3,\*</sup>

<sup>1</sup> Department of Chemistry, Jahangirnagar University, Dhaka-1342, Bangladesh. Email:  
enamullah@juniv.edu

<sup>2</sup> Department of Chemistry, University of Manitoba, 144 Dysart Road, Winnipeg, Manitoba, R3T 2N2, Canada.

<sup>3</sup> Institut für Anorganische Chemie und Strukturchemie, Universität Düsseldorf, Universitätsstr. 1, D-40225 Düsseldorf, Germany.

<sup>4</sup> Institute of Physics of Materials, Czech Academy of Sciences, Žitkova 22, 61662 Brno, Czech Republic.

<sup>5</sup> Department of Inorganic Chemistry, Faculty of Science, Palacký University Olomouc, Olomouc 77146, Czech Republic.

\*Corresponding Author: enamullah@juniv.edu (M.E); janiak@uni-duesseldorf.de (C.J).

Dedicated in memory of Professor ABP Lever, Department of Chemistry, York University, Toronto, Canada.

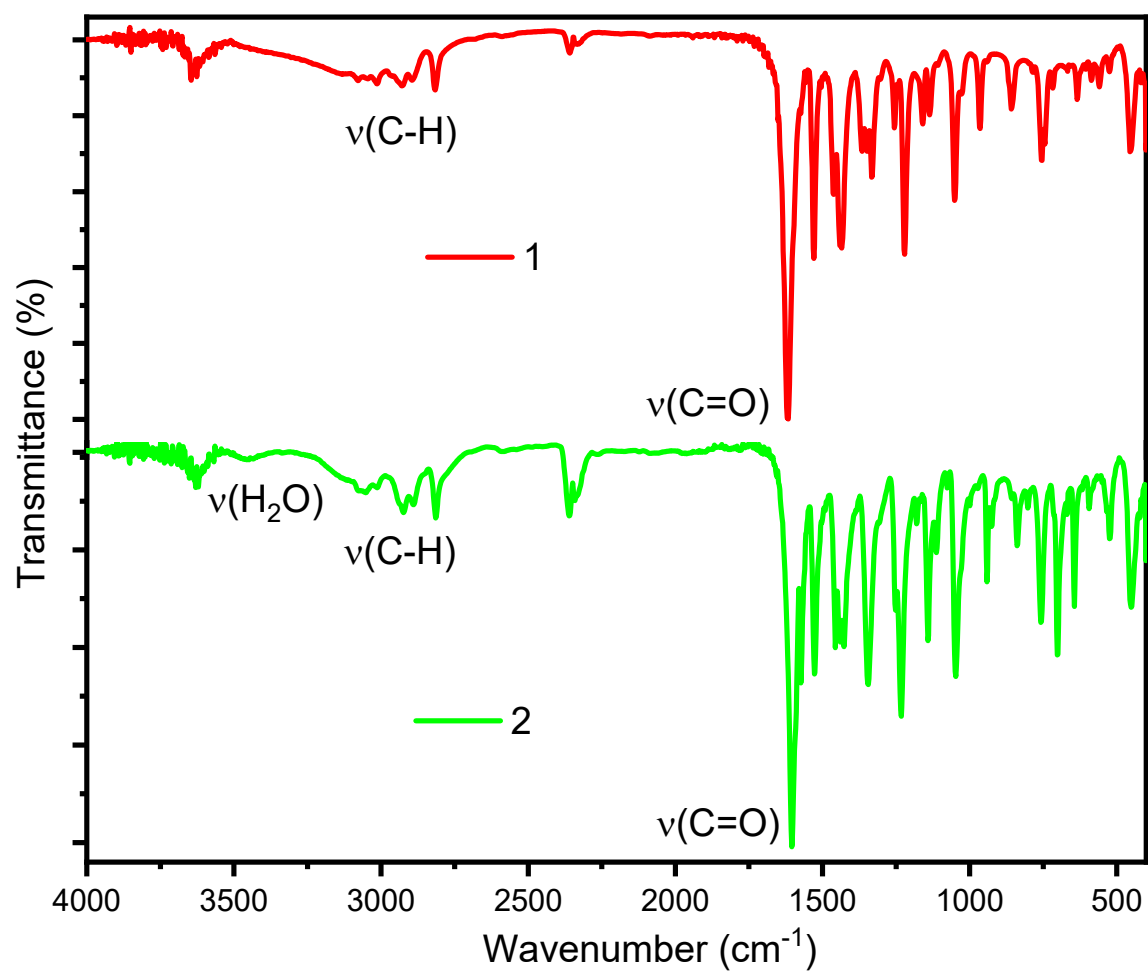

**Fig. S1.** FT-IR (KBr,  $\text{cm}^{-1}$ ) for complexes **1** and **2**.

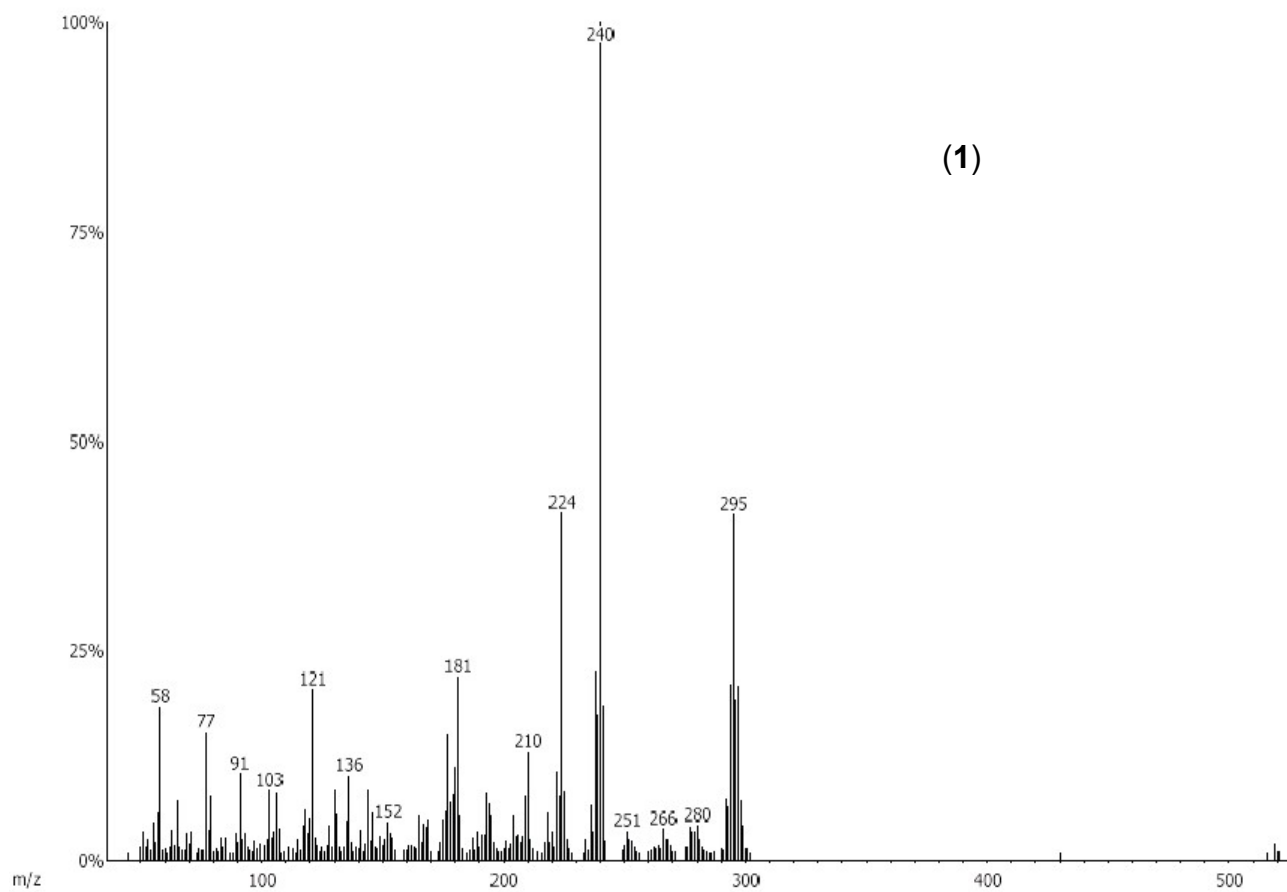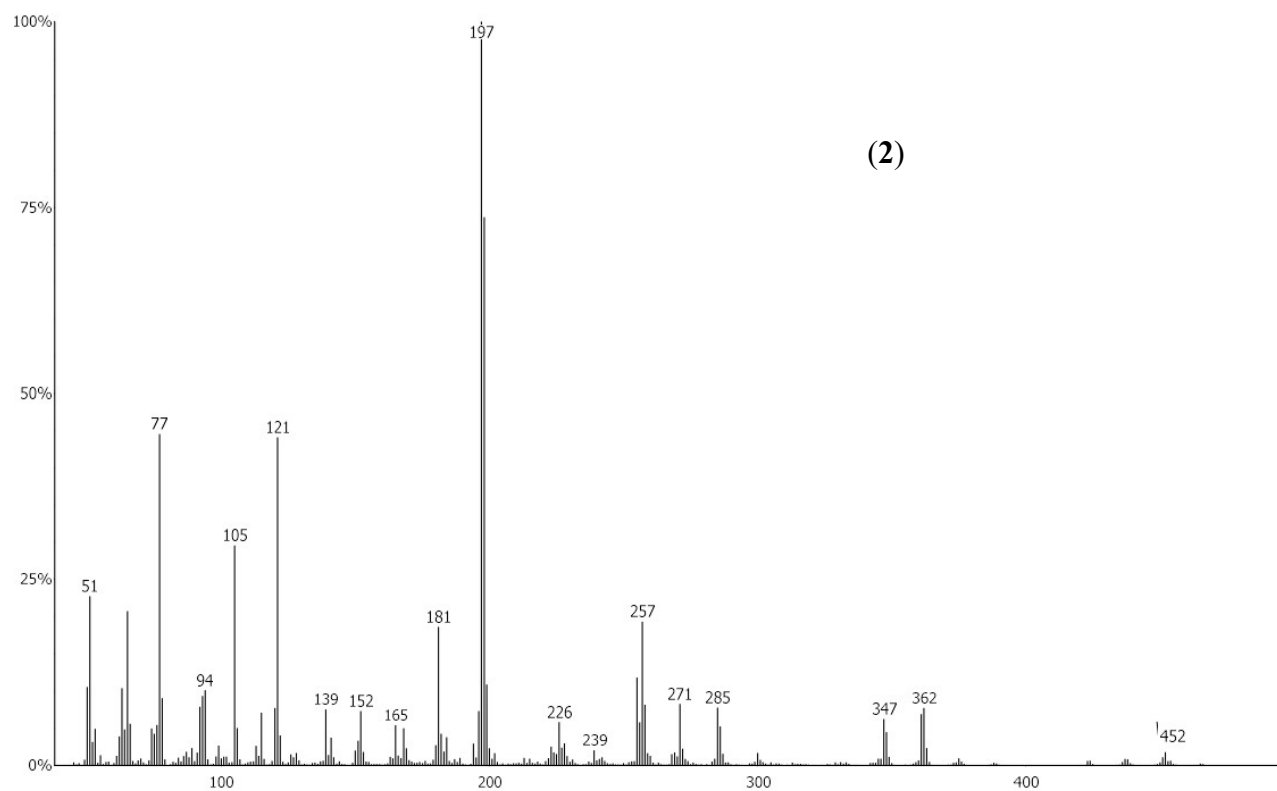

**Fig. S2.** EI-mass spectrum for complexes **1** and **2** (monoligated species).

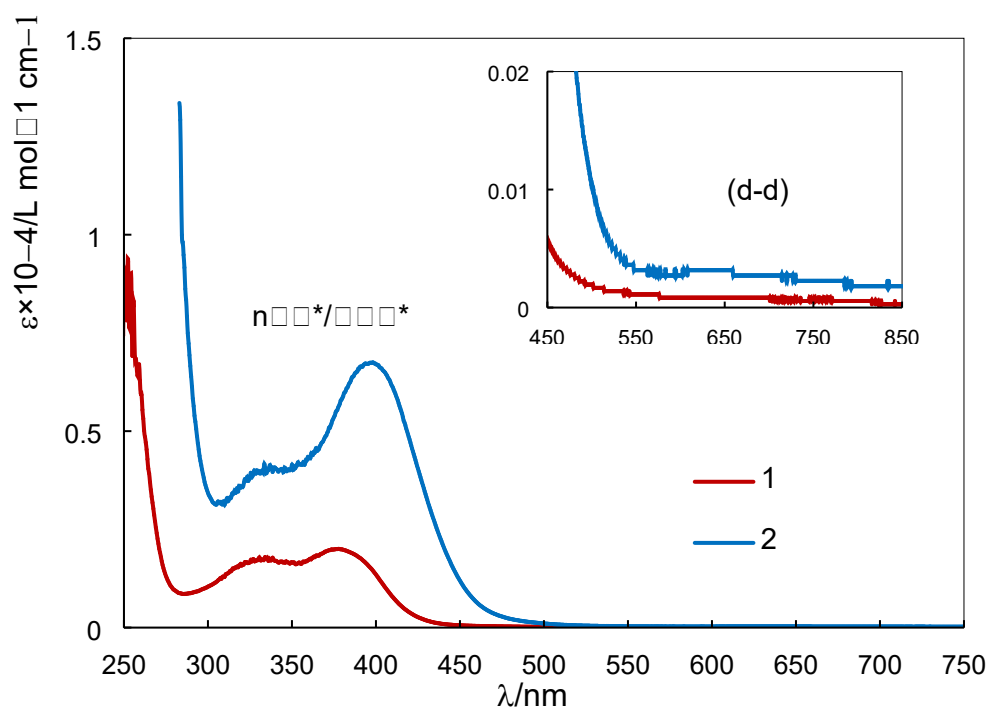

**Fig. S3.** Electronic absorption spectra for **1** (0.36 mM) and **2** (0.22 mM) in chloroform at 25 °C.

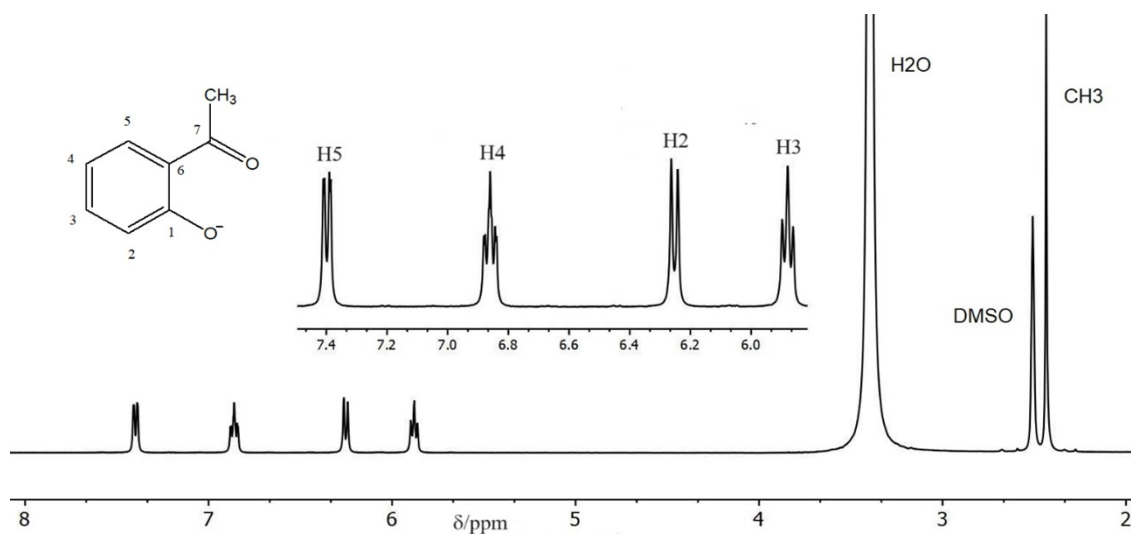

**Fig. S4.**  $^1\text{H}$  NMR spectrum for HL (isolated *via* decomplexation of **1** with NaCN) in DMSO- $\text{d}_6$  at 20 °C.

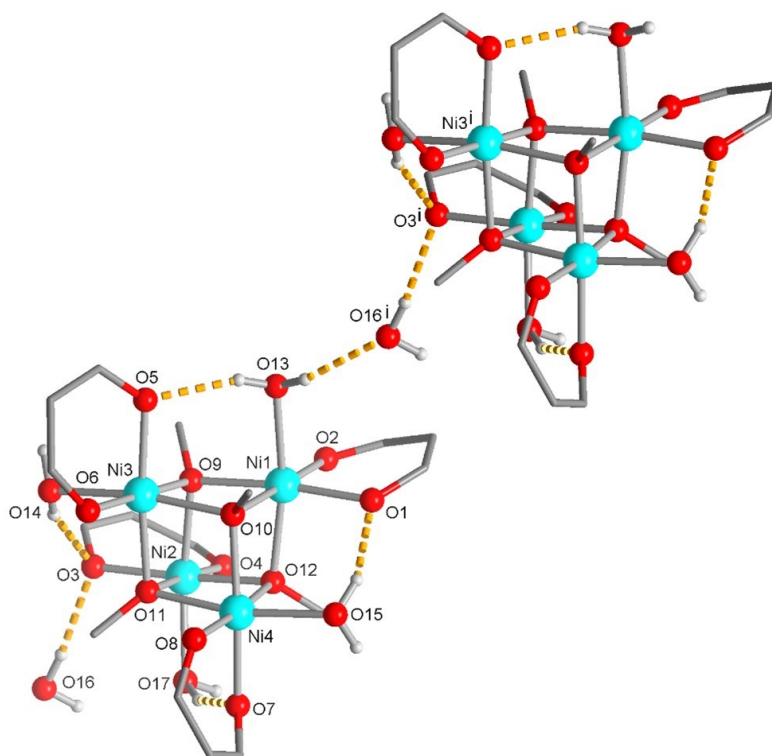

**Fig. S5.** Illustration of intra- and inter-molecular hydrogen bonds (dashed orange lines) in **2** between the symmetry related complexes and the lattice water molecule (for details and symmetry operations see Tables S2). For clarity, the remaining carbon atoms of the six-membered chelate ring and the methoxy group are depicted in wireframe mode. Note that from the water molecules with O14, O15, O16 and O17 only one H-atom participates in H-bonding. The other H-atom is without an acceptor.

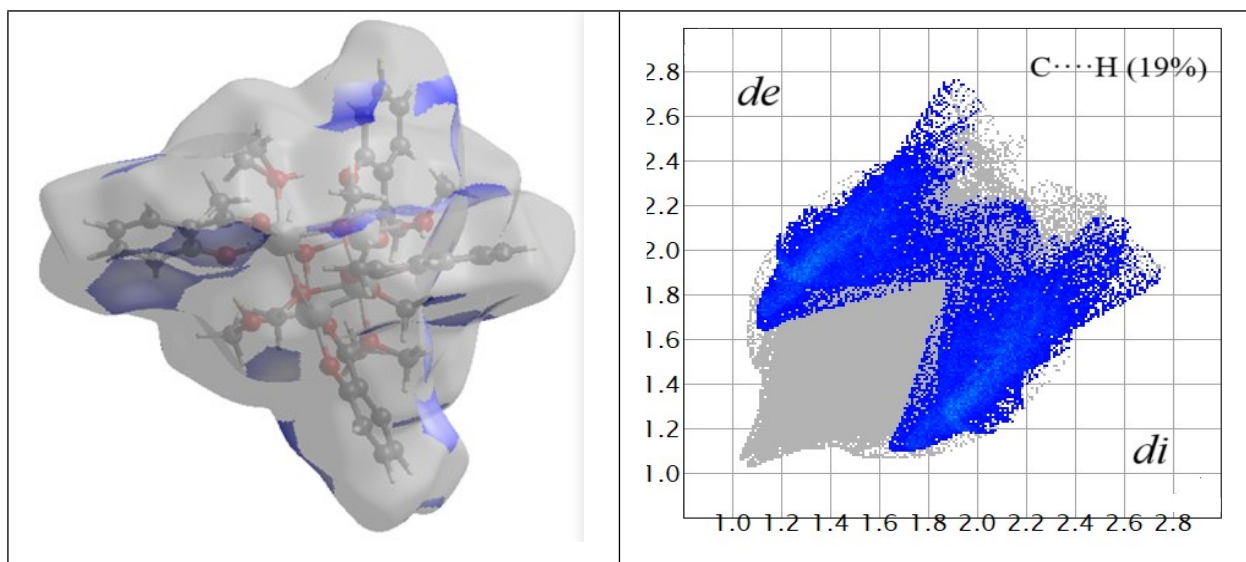

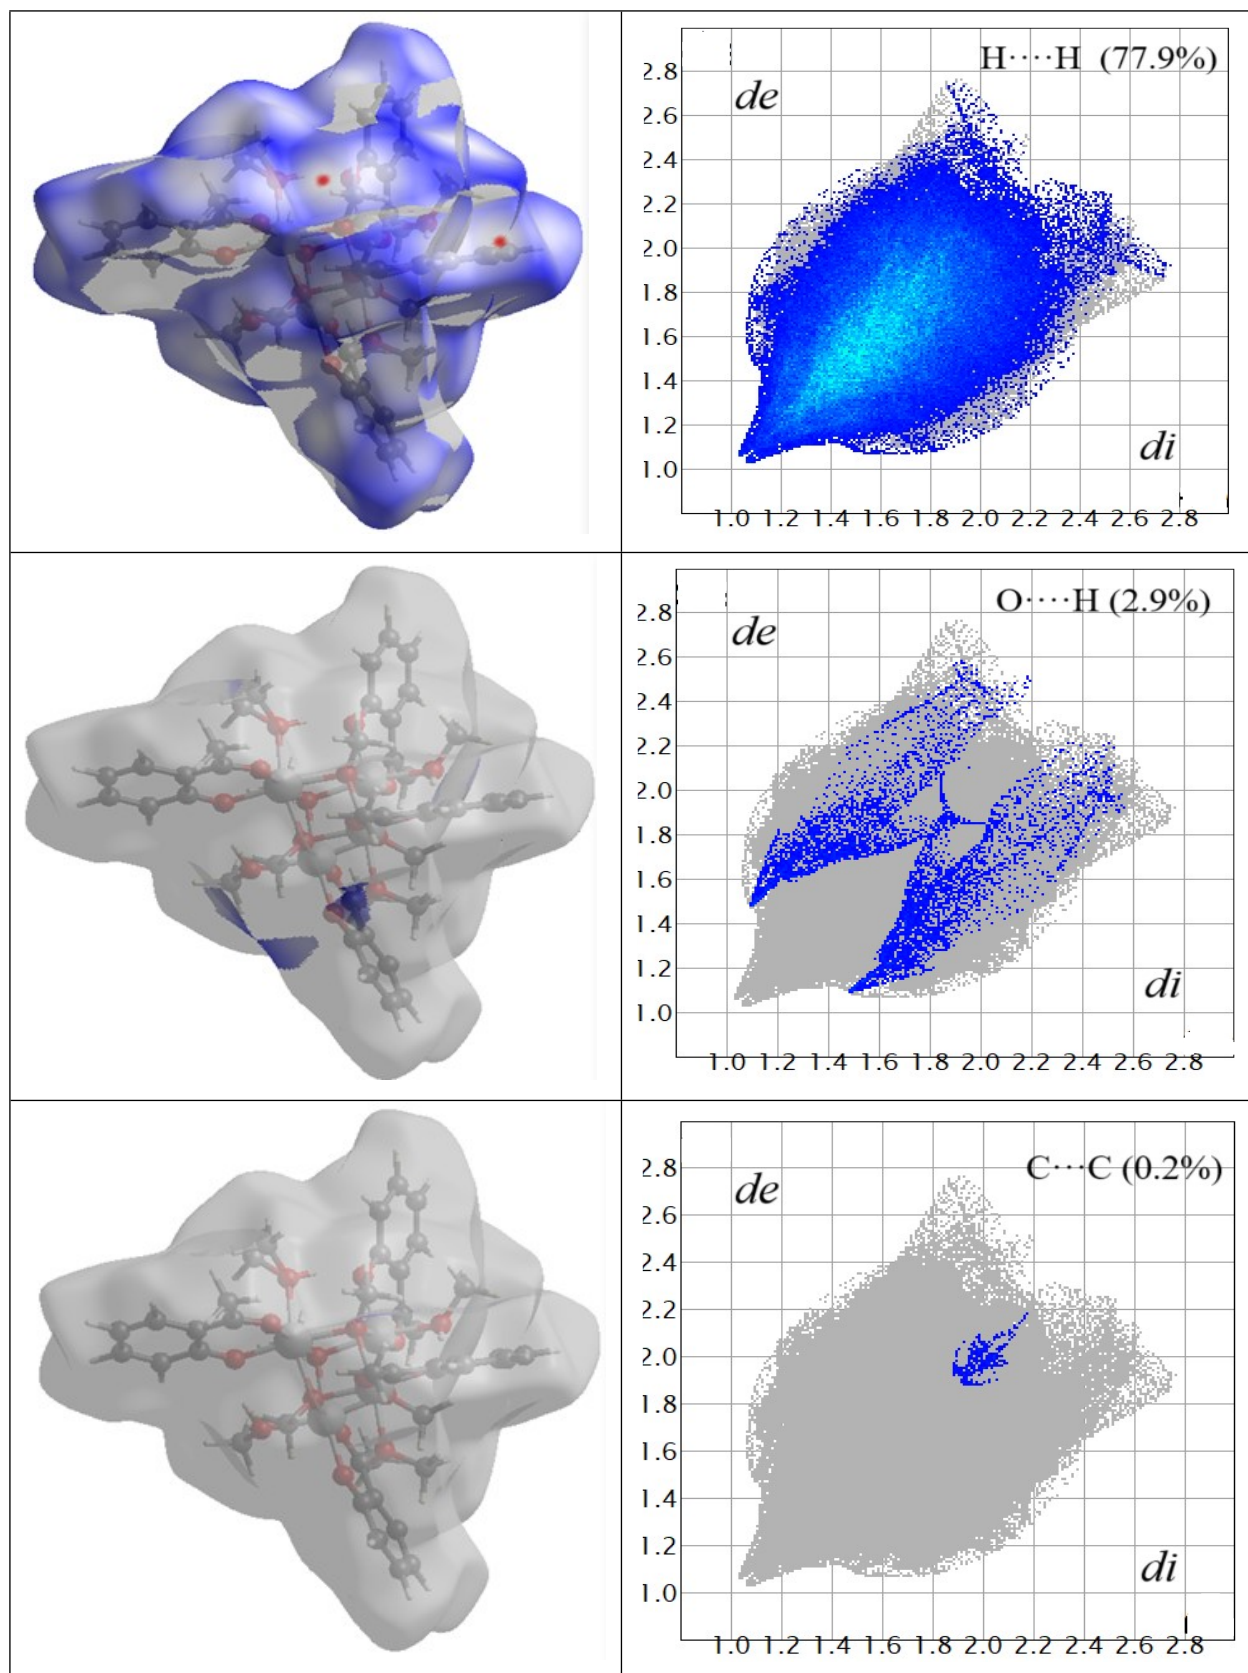

**Fig. S6.** Hirshfeld surface mapped with the d-norm property (left side) and 2D fingerprint plot (right side), showing details breakdown of all relative contributions to Hirshfeld surface from closest contacts for compound **1**.

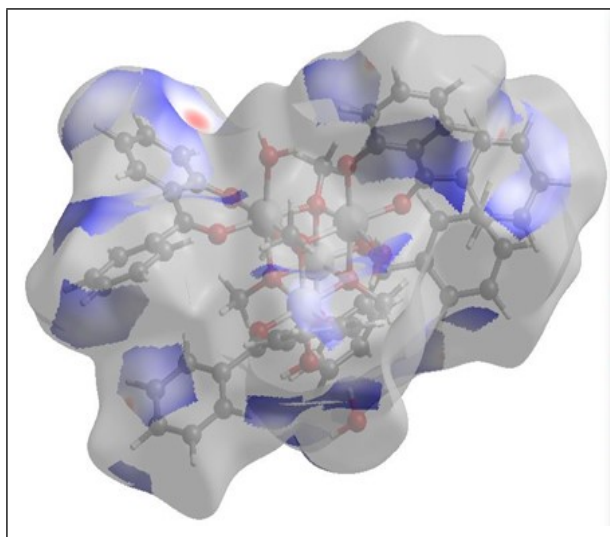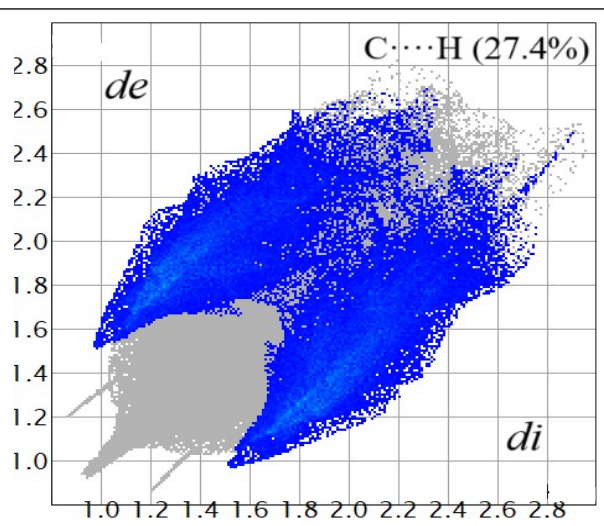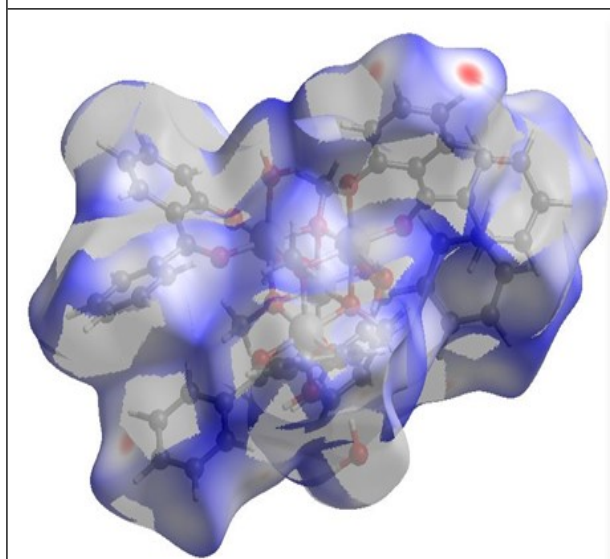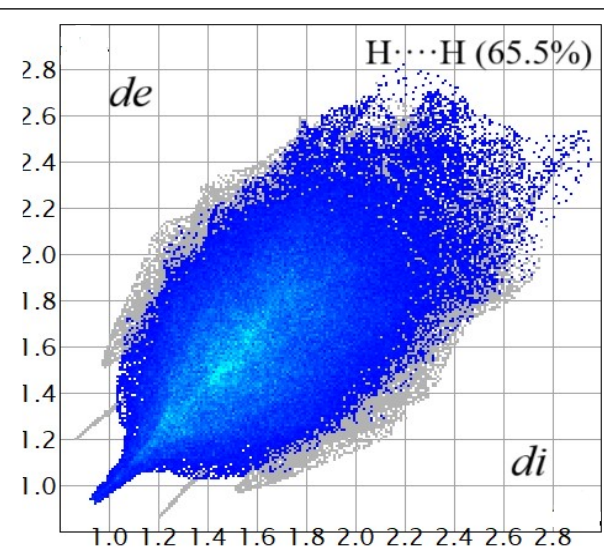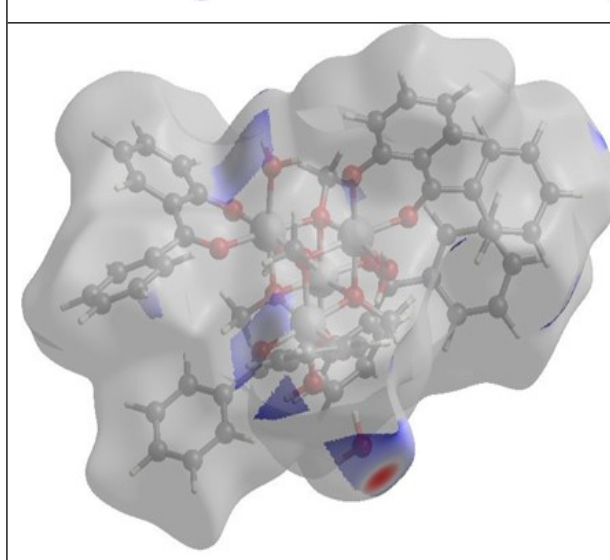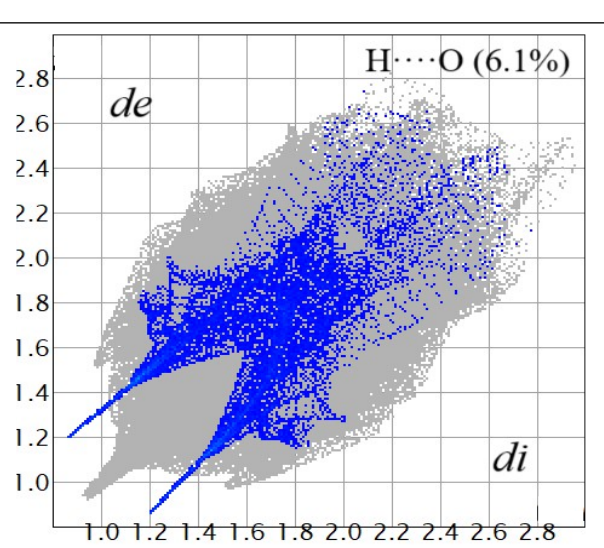

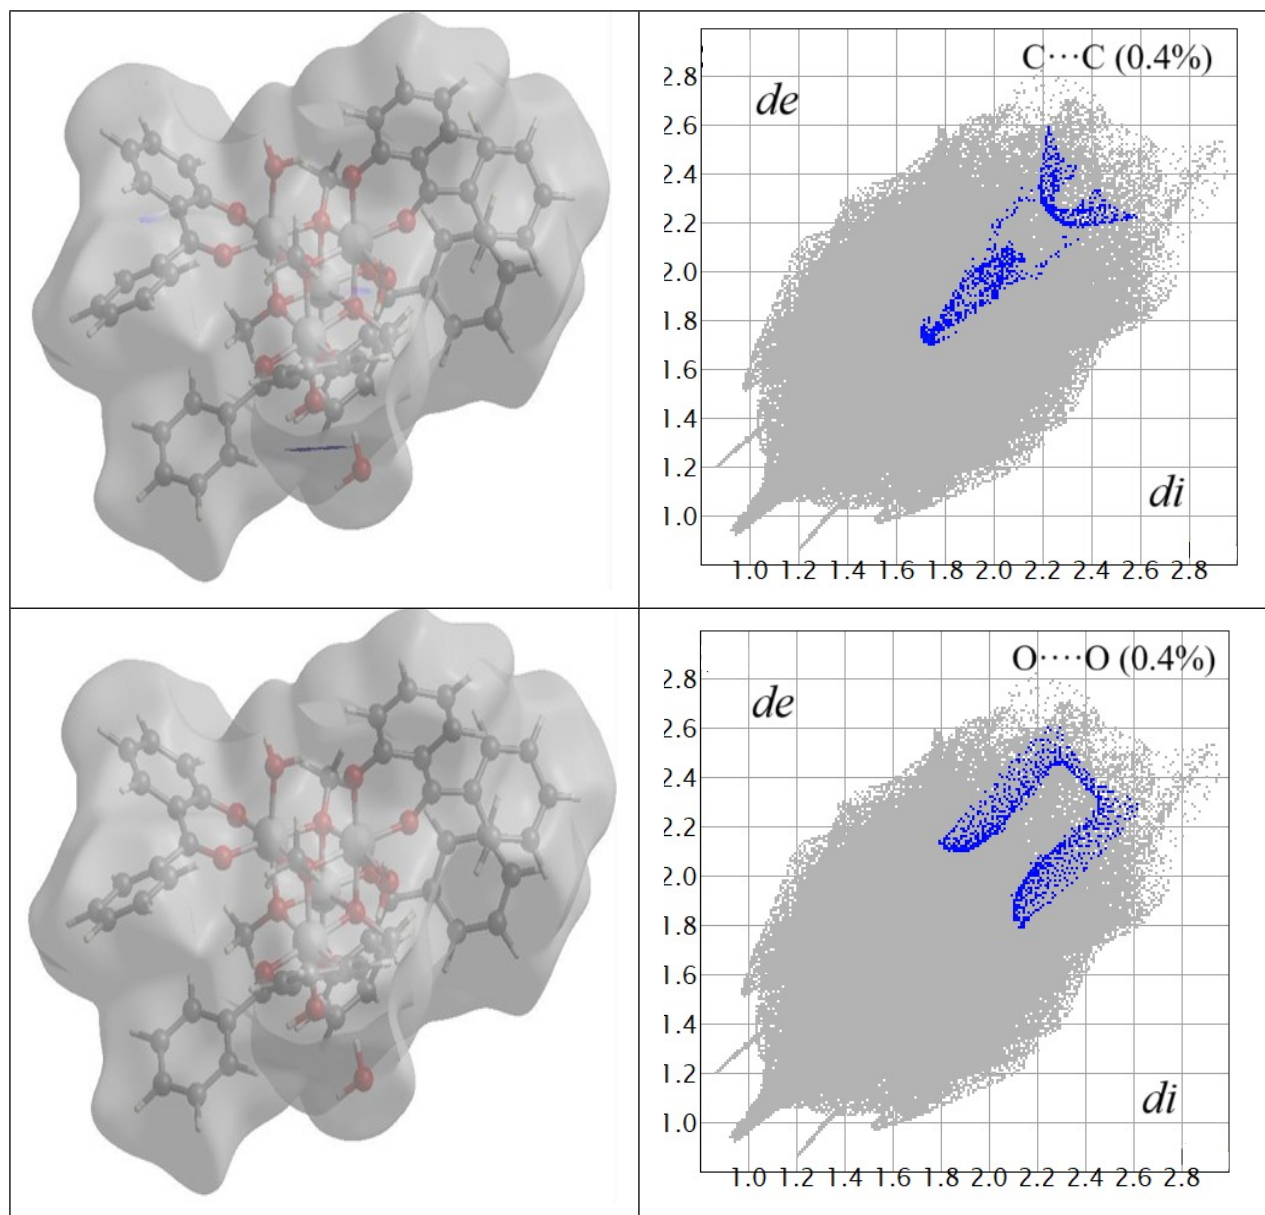

**Fig. S7.** Hirshfeld surface mapped with the d-norm property (left side) and 2D fingerprint plot (right side), showing details breakdown of all relative contributions to Hirshfeld surface from closest contacts for compound **2**.

**Table S1.** Hydrogen-bond geometry (Å, °) for **1**

| $D-H\cdots A$        | $D-H$    | $H\cdots A$ | $D\cdots A$ | $D-H\cdots A$ |
|----------------------|----------|-------------|-------------|---------------|
| O10–H10 $\cdots$ O11 | 0.91 (4) | 1.80 (4)    | 2.686 (2)   | 164 (4)       |
| O7–H7 $\cdots$ O8    | 0.96 (2) | 1.78 (2)    | 2.704 (2)   | 162 (5)       |
| O13–H13 $\cdots$ O14 | 0.86 (5) | 1.82 (5)    | 2.663 (2)   | 166 (5)       |
| O16–H16 $\cdots$ O5  | 0.82 (6) | 1.96 (6)    | 2.745 (2)   | 160 (6)       |



**Table S2.** Hydrogen-bond geometry (Å, °) for **2**.

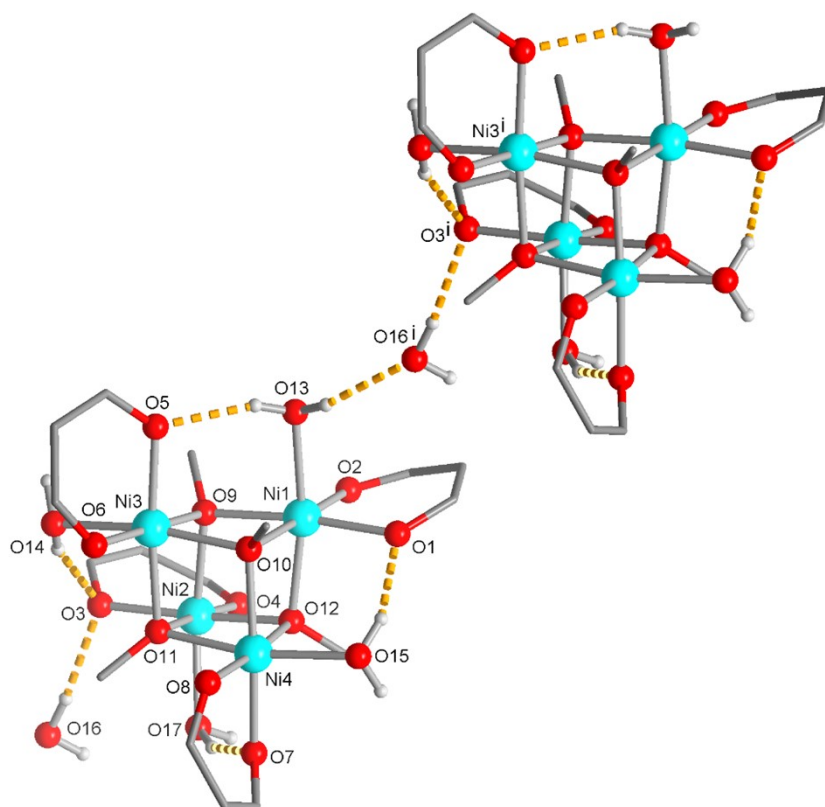

| $D-H\cdots A$                      | $D-H$ | $H\cdots A$ | $D\cdots A$ | $D-H\cdots A$ |
|------------------------------------|-------|-------------|-------------|---------------|
| O13-H13A $\cdots$ O5               | 0.87  | 1.97        | 2.776 (3)   | 154           |
| O13-H13B $\cdots$ O16 <sup>i</sup> | 0.87  | 2.19        | 3.017(3)    | 160           |
| O14-H14A $\cdots$ O3               | 0.87  | 1.97        | 2.806 (3)   | 160           |
| O15-H15A $\cdots$ O1               | 0.87  | 1.93        | 2.749 (3)   | 157           |
| O17-H17A $\cdots$ O7               | 0.87  | 1.88        | 2.701 (3)   | 157           |
| O16-H16A $\cdots$ O3               | 0.87  | 2.10        | 2.969(3)    | 174           |

Symmetry transformation:  $i = 1+x, y, z$

Note that from the water molecules with O14, O15, O16 and O17 only one H-atom participates in H-bonding. The other H-atom is without an acceptor.

### BS-DFT studies

The positions of the hydrogen atoms were normalized. The BS-DFT calculations were performed for all six pairs of the Ni atoms within the cubane core, resulting in six calculations. In each case, two Ni atoms were substituted with diamagnetic  $d^{10}$  Zn(II) atoms to obtain the pair isotropic exchange interaction constant  $J_{ij}$  (e.g. for  $J_{12}$  the fragment containing NiNiZnZn atoms) using the following spin Hamiltonian for two paramagnetic centers A and B:  $\hat{H}_i = JS_A S_B$ . The energies of high spin (HS,  $A\uparrow B\uparrow$ ) and broken symmetry states (BS,  $A\uparrow B\downarrow$ ) were evaluated using Ruiz approach to calculate the

$J$  values.<sup>1</sup> The BS-DFT calculations were performed using Orca 4.2.1 software<sup>2</sup> package and we used hybrid functional B3LYP<sup>3</sup> and with Ahlrichs's triple- $\zeta$  basis sets def2-TZVP.<sup>4</sup>

**Acetophenone based complex 1:**

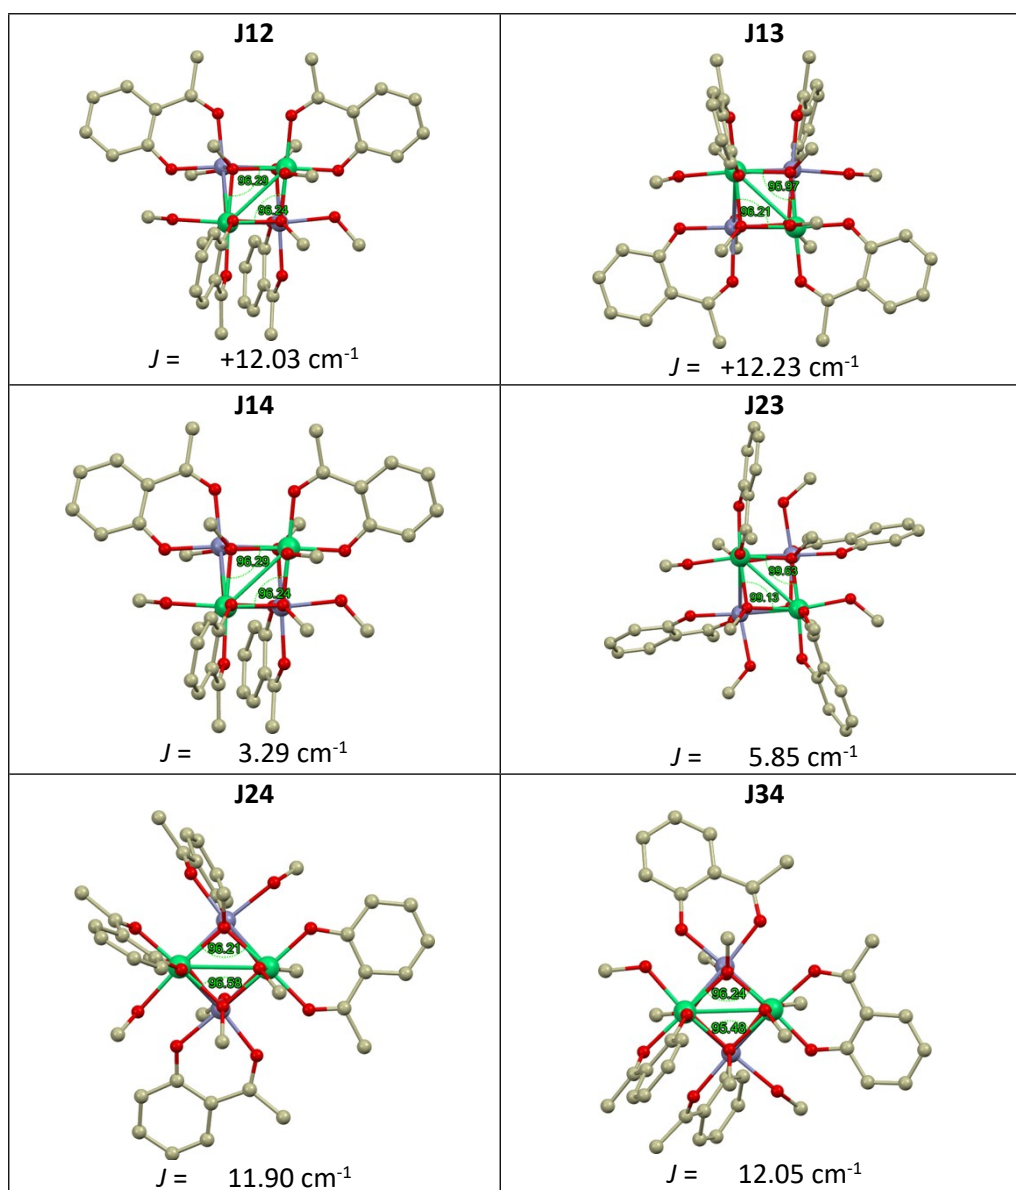

Coupling scheme for fitting of magnetic data:

$$J1 = J12 = J13 = J24 = J34$$

$$J2 = J14, J3 = J23$$

## Benzophenone based complex 2:

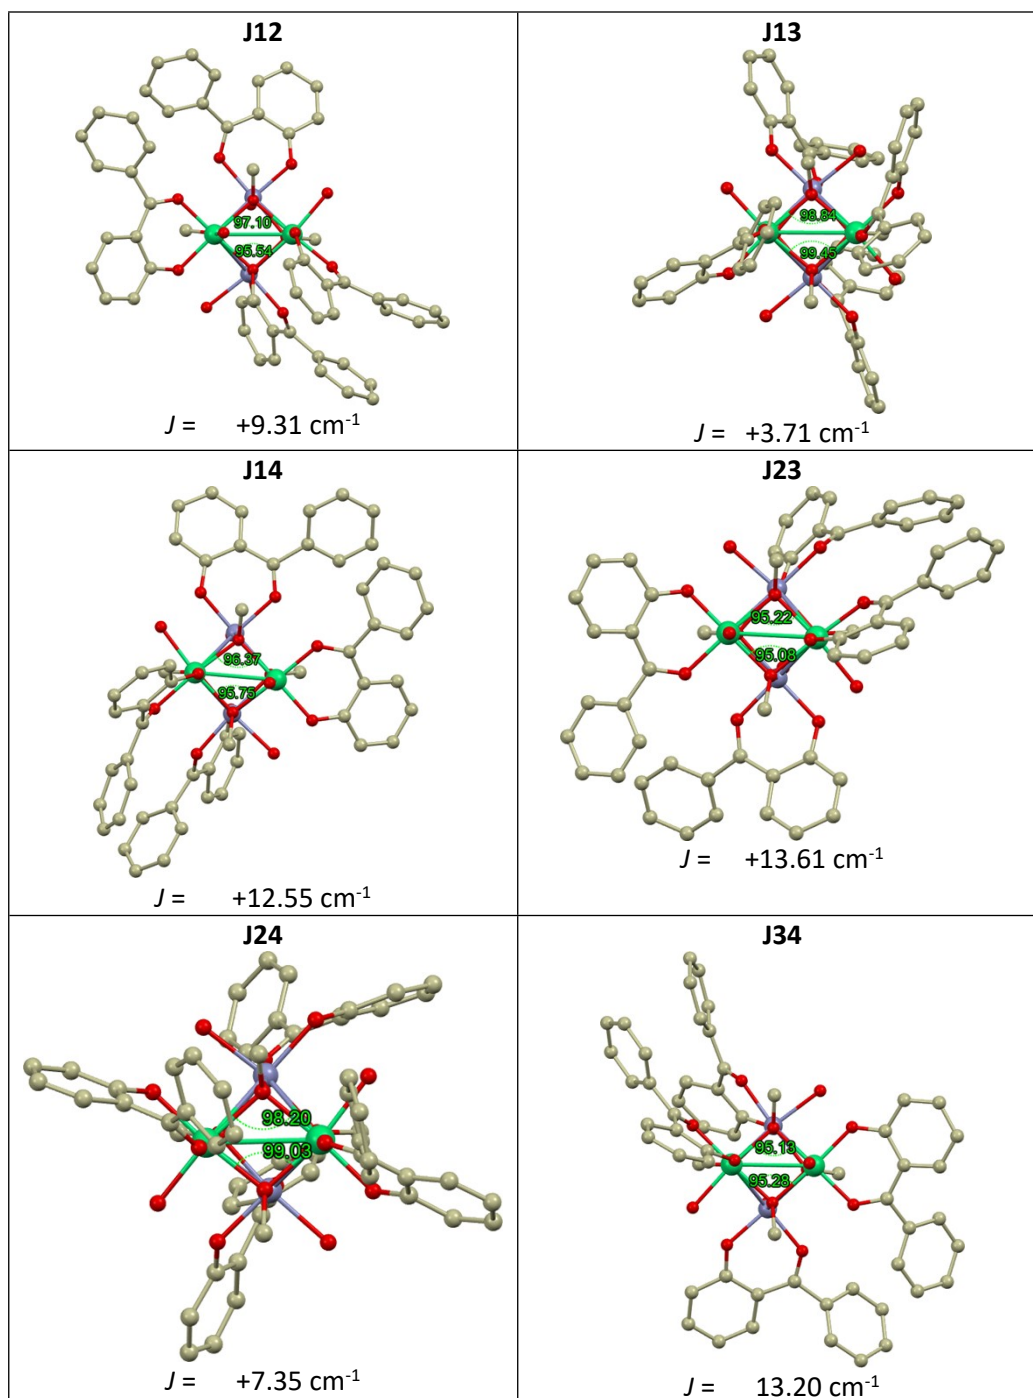

Coupling scheme for fitting of magnetic data:

$$J1 = J12 = J24$$

$$J2 = J13, J3 = J14 = J23 = J34$$

## Magnetic data fitting

The magnetic data following isotropic exchange spin Hamiltonians for fitting of the magnetic data measured for **1** and **2** (3J model):

$$\hat{H}_{iso} = -J_1(\vec{S}_1\vec{S}_2 + \vec{S}_1\vec{S}_3 + \vec{S}_2\vec{S}_4 + \vec{S}_3\vec{S}_4) - J_2(\vec{S}_1\vec{S}_4) - J_3(\vec{S}_2\vec{S}_3) \quad (1) \quad \text{for } \mathbf{1} \text{ and,}$$

$$\hat{H}_{iso} = -J_1(\vec{S}_1\vec{S}_2 + \vec{S}_2\vec{S}_4) - J_2(\vec{S}_1\vec{S}_3) - J_3(\vec{S}_1\vec{S}_4 + \vec{S}_2\vec{S}_3 + \vec{S}_3\vec{S}_4) \quad (2) \quad \text{for } \mathbf{2}, \text{ respectively.}$$

Then, the overall spin Hamiltonian including axial parameter of magnetic anisotropy  $D$  then reads:

$$\hat{H} = \hat{H}_{iso} + \sum_{i=1}^4 D_i(\hat{S}_z^2 - \hat{S}^2) + \mu_B B_a \sum_{i=1}^4 g\hat{S}_i \quad (3)$$

where a-direction of the magnetic field is defined as  $B_a = B(\sin(\theta)\cos(\varphi), \sin(\theta)\sin(\varphi), \cos(\theta))$ .

In the case of the 1J model the following spin Hamiltonian for isotropic exchange was used:

$$\hat{H}_{iso} = -J_1(\vec{S}_1\vec{S}_2 + \vec{S}_1\vec{S}_3 + \vec{S}_1\vec{S}_4 + \vec{S}_2\vec{S}_3 + \vec{S}_2\vec{S}_4 + \vec{S}_3\vec{S}_4) \quad (4)$$

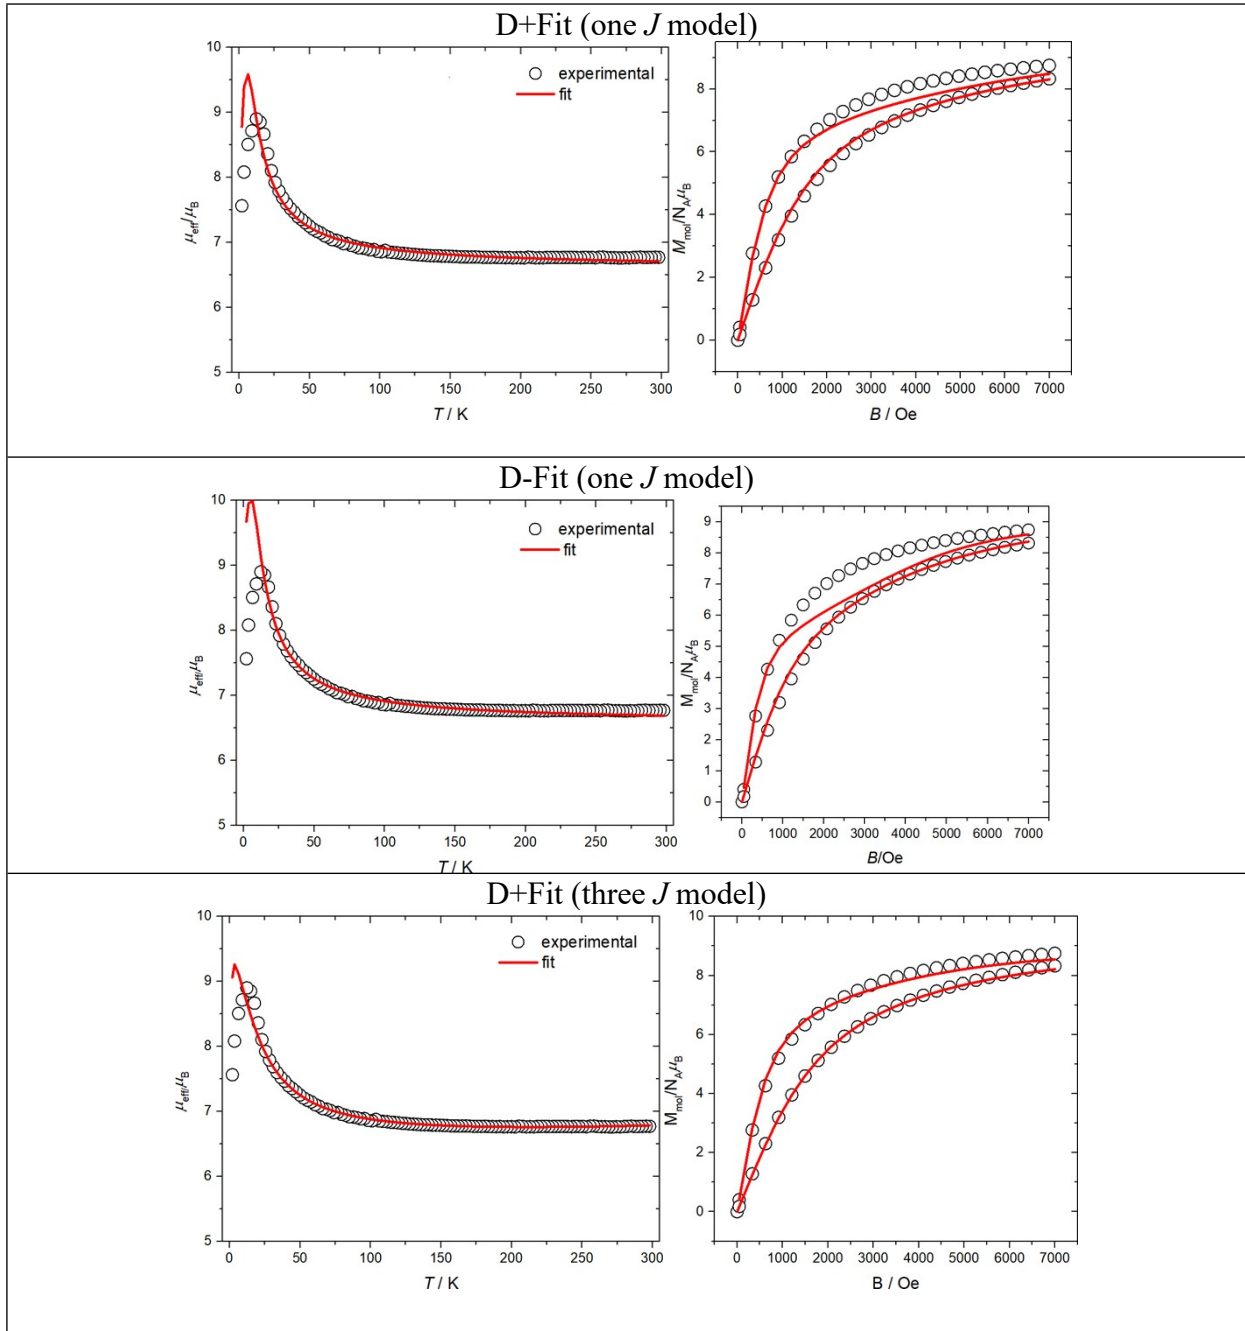

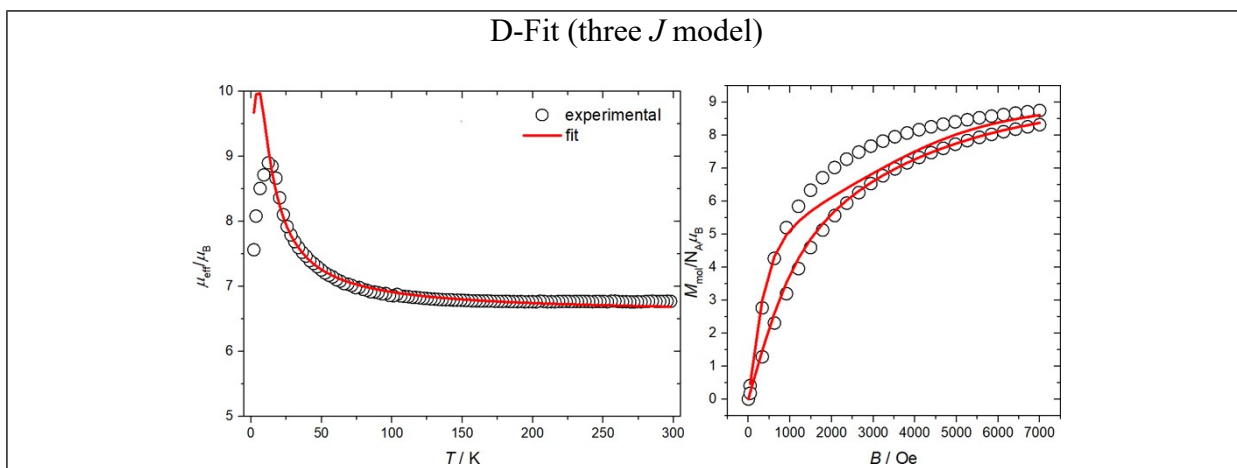

**Fig. S8.** Fits of the magnetic data for compound **1** using Eq. 1 or Eq. 3.

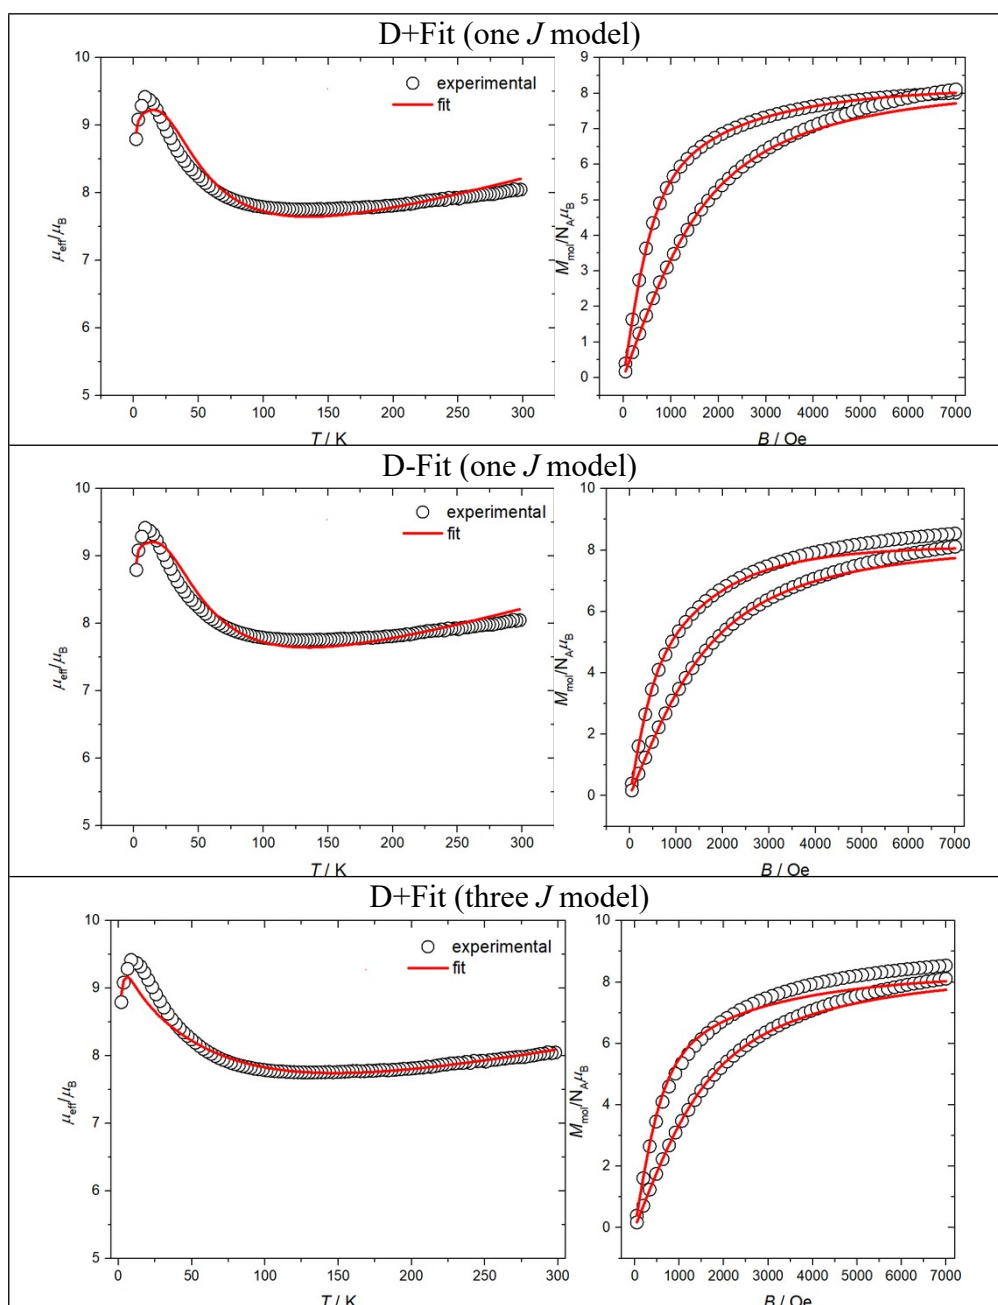

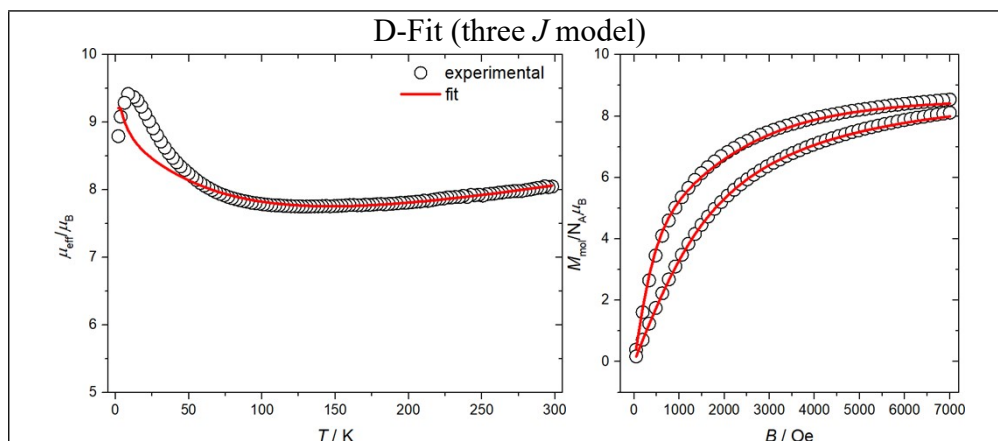

**Fig. S9.** Fits of the magnetic data for compound **2** using Eq. 1 or Eq. 3.

**Table S3.** The fitted spin Hamiltonian parameters for compound **1**.

| <b>1</b>        | $g_{\text{iso}}$ | $D/\text{cm}^{-1}$ | $J_1/\text{cm}^{-1}$ | $J_2/\text{cm}^{-1}$ | $J_3/\text{cm}^{-1}$ | $\chi_{\text{TIP}}$ |
|-----------------|------------------|--------------------|----------------------|----------------------|----------------------|---------------------|
| 1J model $+D_I$ | 2.335            | +7.8               | +3.2                 | —                    | —                    | 0                   |
| 1J model $-D_I$ | 2.324            | -7.6               | +3.5                 | —                    | —                    | 0                   |
| 3J model $+D$   | 2.329            | +6.8               | +1.1                 | -4.7                 | +12.1                | 0                   |
| 3J model $-D$   | 2.324            | -7.5               | +2.9                 | +3.8                 | +5.6                 | 0                   |

**Table S4.** The fitted spin Hamiltonian parameters for compound **2**.

| <b>2</b>        | $g_{\text{iso}}$ | $D/\text{cm}^{-1}$ | $J_1/\text{cm}^{-1}$ | $J_2/\text{cm}^{-1}$ | $J_3/\text{cm}^{-1}$ | $\chi_{\text{TIP}}$ |
|-----------------|------------------|--------------------|----------------------|----------------------|----------------------|---------------------|
| 1J model $+D_I$ | 2.054            | 3.7                | +14.3                | —                    | —                    | 150.7               |
| 1J model $-D_I$ | 2.045            | -2.7               | +14.5                | —                    | —                    | 152.2               |
| 3J model $+D$   | 2.084            | +4.7               | -5.7                 | -1.1                 | +46.6                | 124.6               |
| 3J model $-D$   | 2.161            | -3.9               | -8.8                 | -1.0                 | +43.6                | 111.1               |

## References

- (a). E. Ruiz, J. Cano, S. Alvarez, P. Alemany *J. Comput. Chem.*, 20 (1999), p. 1391, (b) E. Ruiz, A. Rodríguez-Forteza, J. Cano, S. Alvarez, P. Alemany *J. Comput. Chem.*, 24 (2003), p. 982.
- F. Neese, *Wiley Interdiscip. Rev. Comput. Mol. Sci.*, 2018, 8, e1327
- (a). A. D. Becke, *Phys. Rev. A: At., Mol., Opt. Phys.*, 1988, 38, 3098–3100, (b) C. Lee, W. Yang and R. G. Parr, *Phys. Rev. B: Condens. Matter Mater. Phys.*, 1988, 37, 785–789
- F. Weigend and R. Ahlrichs, *Phys. Chem. Chem. Phys.*, 2005, 7, 3297–3305
